# Supplementary material for: Individual and Interactive Effects of Socio-Ecological Factors on Dengue Fever at Fine Spatial Scale: A Geographical Detector-Based Analysis
Source: PubMed Central journal article supplement (PMC5551233; doi:10.3390/ijerph14070795), 2017-07-17
Supplement: ijerph-14-00795-s001.pdf [file ijerph-14-00795-s001.pdf]

Table S1 Number of indigenous cases by gender, age and employment status in Guangzhou 2014

| Variables                               | Indigenous cases (incidence rate/10 <sup>5</sup> ) |          |
|-----------------------------------------|----------------------------------------------------|----------|
| Total cases                             | 37322                                              | (289.97) |
| Gender                                  |                                                    |          |
| Male                                    | 18388                                              | (273.98) |
| Female                                  | 18934                                              | (307.39) |
| Age group (years)                       |                                                    |          |
| <15                                     | 2693                                               | (189.86) |
| 15-44                                   | 20024                                              | (255.97) |
| 45-64                                   | 10111                                              | (370.79) |
| >64                                     | 4494                                               | (497.64) |
| Employment status (constituent ratio %) |                                                    |          |
| Household/unemployed                    | 8717                                               | (23.36)  |
| Retired                                 | 5221                                               | (13.99)  |
| Business service                        | 4436                                               | (11.89)  |
| Worker                                  | 4194                                               | (11.24)  |
| Student                                 | 2788                                               | (7.47)   |
| Farmer                                  | 1356                                               | (3.63)   |
| Administrative staff                    | 1762                                               | (4.72)   |
| Other                                   | 1419                                               | (3.80)   |
| Unknown                                 | 7429                                               | (19.90)  |

Table S2. Interactive impact of socio-ecological factors on dengue fever incidence

| X <sub>1</sub> ∩X <sub>2</sub> = X <sub>3</sub> | X <sub>1</sub> | X <sub>2</sub> | Relation among X <sub>1</sub> , X <sub>2</sub> , X <sub>3</sub>     |
|-------------------------------------------------|----------------|----------------|---------------------------------------------------------------------|
| GDP ∩ Urb=0.15**                                | 0.03           | 0.11           | X <sub>3</sub> > X <sub>1</sub> + X <sub>2</sub> Enhance, nonlinear |
| GDP ∩ Uv=0.15                                   | 0.03           | 0.13           | X <sub>3</sub> >Max(X <sub>1</sub> , X <sub>2</sub> ) Enhance, bi   |
| GDP ∩ Roa=0.29**                                | 0.03           | 0.24           | X <sub>3</sub> > X <sub>1</sub> + X <sub>2</sub> Enhance, nonlinear |
| GDP ∩ Pop=0.07                                  | 0.03           | 0.03           | X <sub>3</sub> > X <sub>1</sub> + X <sub>2</sub> Enhance, nonlinear |
| GDP ∩ Water=0.25**                              | 0.03           | 0.23           | X <sub>3</sub> >Max(X <sub>1</sub> , X <sub>2</sub> ) Enhance, bi   |
| GDP ∩ Veg=0.24**                                | 0.03           | 0.19           | X <sub>3</sub> > X <sub>1</sub> + X <sub>2</sub> Enhance, nonlinear |
| GDP ∩ Temp=0.35**                               | 0.03           | 0.33           | X <sub>3</sub> >Max(X <sub>1</sub> , X <sub>2</sub> ) Enhance, bi   |
| GDP ∩ Preci=0.26**                              | 0.03           | 0.24           | X <sub>3</sub> >Max(X <sub>1</sub> , X <sub>2</sub> ) Enhance, bi   |
| Urb ∩ Uv=0.19**                                 | 0.11           | 0.13           | X <sub>3</sub> >Max(X <sub>1</sub> , X <sub>2</sub> ) Enhance, bi   |
| Urb ∩ Roa=0.31**                                | 0.11           | 0.24           | X <sub>3</sub> >Max(X <sub>1</sub> , X <sub>2</sub> ) Enhance, bi   |
| Urb ∩ Pop=0.13**                                | 0.11           | 0.03           | X <sub>3</sub> >Max(X <sub>1</sub> , X <sub>2</sub> ) Enhance, bi   |
| Urb ∩ Water=0.25**                              | 0.11           | 0.23           | X <sub>3</sub> >Max(X <sub>1</sub> , X <sub>2</sub> ) Enhance, bi   |
| Urb ∩ Veg=0.29                                  | 0.11           | 0.19           | X <sub>3</sub> >Max(X <sub>1</sub> , X <sub>2</sub> ) Enhance, bi   |
| Urb ∩ Temp=0.35**                               | 0.11           | 0.33           | X <sub>3</sub> >Max(X <sub>1</sub> , X <sub>2</sub> ) Enhance, bi   |
| Urb ∩ Preci=0.31**                              | 0.11           | 0.24           | X <sub>3</sub> >Max(X <sub>1</sub> , X <sub>2</sub> ) Enhance, bi   |
| Uv ∩ Roa=0.30**                                 | 0.13           | 0.24           | X <sub>3</sub> >Max(X <sub>1</sub> , X <sub>2</sub> ) Enhance, bi   |
| Uv ∩ Pop=0.14**                                 | 0.13           | 0.03           | X <sub>3</sub> >Max(X <sub>1</sub> , X <sub>2</sub> ) Enhance, bi   |
| Uv ∩ Water=0.28**                               | 0.13           | 0.23           | X <sub>3</sub> >Max(X <sub>1</sub> , X <sub>2</sub> ) Enhance, bi   |
| Uv ∩ Veg=0.24*                                  | 0.13           | 0.19           | X <sub>3</sub> >Max(X <sub>1</sub> , X <sub>2</sub> ) Enhance, bi   |
| Uv ∩ Temp=0.38**                                | 0.13           | 0.33           | X <sub>3</sub> >Max(X <sub>1</sub> , X <sub>2</sub> ) Enhance, bi   |
| Uv ∩ Preci=0.31**                               | 0.13           | 0.24           | X <sub>3</sub> >Max(X <sub>1</sub> , X <sub>2</sub> ) Enhance, bi   |
| Roa ∩ Pop=0.25**                                | 0.24           | 0.03           | X <sub>3</sub> >Max(X <sub>1</sub> , X <sub>2</sub> ) Enhance, bi   |
| Roa ∩ Water=0.35**                              | 0.24           | 0.23           | X <sub>3</sub> >Max(X <sub>1</sub> , X <sub>2</sub> ) Enhance, bi   |
| Roa ∩ Veg=0.33                                  | 0.24           | 0.19           | X <sub>3</sub> >Max(X <sub>1</sub> , X <sub>2</sub> ) Enhance, bi   |
| Roa ∩ Temp=0.41**                               | 0.24           | 0.33           | X <sub>3</sub> >Max(X <sub>1</sub> , X <sub>2</sub> ) Enhance, bi   |
| Roa ∩ Preci=0.40**                              | 0.24           | 0.24           | X <sub>3</sub> >Max(X <sub>1</sub> , X <sub>2</sub> ) Enhance, bi   |
| Pop ∩ Water=0.24**                              | 0.03           | 0.23           | X <sub>3</sub> >Max(X <sub>1</sub> , X <sub>2</sub> ) Enhance, bi   |

|                           |      |      |                                          |
|---------------------------|------|------|------------------------------------------|
| Pop $\cap$ Veg=0.21**     | 0.03 | 0.19 | $X_3 > \text{Max}(X_1, X_2)$ Enhance, bi |
| Pop $\cap$ Temp=0.34**    | 0.03 | 0.33 | $X_3 > \text{Max}(X_1, X_2)$ Enhance, bi |
| Pop $\cap$ Preci=0.28**   | 0.03 | 0.24 | $X_3 > X_1 + X_2$ Enhance, nonlinear     |
| Water $\cap$ Veg=0.29**   | 0.23 | 0.19 | $X_3 > \text{Max}(X_1, X_2)$ Enhance, bi |
| Water $\cap$ Temp=0.39**  | 0.23 | 0.33 | $X_3 > \text{Max}(X_1, X_2)$ Enhance, bi |
| Water $\cap$ Preci=0.40** | 0.23 | 0.24 | $X_3 > \text{Max}(X_1, X_2)$ Enhance, bi |
| Veg $\cap$ Temp=0.34**    | 0.19 | 0.33 | $X_3 > \text{Max}(X_1, X_2)$ Enhance, bi |
| Veg $\cap$ Preci=0.33**   | 0.19 | 0.24 | $X_3 > \text{Max}(X_1, X_2)$ Enhance, bi |
| Temp $\cap$ Preci=0.42**  | 0.33 | 0.24 | $X_3 > \text{Max}(X_1, X_2)$ Enhance, bi |

\*\*means  $P < 0.01$ , \* means  $P < 0.05$ , GDP means GDP per capita, Urb means urbanization level, Uv means urban village ratio, Roa means road density, Pop means population density, Water means water body area, Veg means vegetation fraction, Temp means temperature, Preci means precipitation.
